# Supplementary material for: Mitochondrial DNA Evidence Indicates the Local Origin of Domestic Pigs in the Upstream Region of the Yangtze River
Source: PLoS One. 2012 Dec 13;7(12):e51649. doi: 10.1371/journal.pone.0051649 (PMC3521662; doi:10.1371/journal.pone.0051649)
Supplement: Table S4 — The geographic distribution of Asian domestic pigs and wild boars within haplogroup A, B and core haplotypes. Note: (-) denotes that no sample was collected. A and B: haplogroup; H1, H2 and H3: core haplotype. The values in parentheses refer to the proportion of individuals that are grouped into this haplogroup or core haplotype. (XLS) [file pone.0051649.s006.xls]

## Sheet: Sheet1
Table S4. The geographic distribution of Asian domestic pigs and wild boars within haplogroup A, B and core haplotypes.
	Tibetan high land		Pacific Island		ISEA		SEA		Yunnan		URYZ		MDYZ		Taiwan		SC		MUYR		DRYR		Korean		Japan		NEC		SA
	domestic	wild	domestic	wild	domestic	wild	domestic	wild	domestic	wild	domestic	wild	domestic	wild	domestic	wild	domestic	wild	domestic	wild	domestic	wild	domestic	wild	domestic	wild	domestic	wild	domestic	wild
A	199 (0.265)	-	4 (0.005)	-	5 (0.007)	0	40 (0.053)	3 (0.045)	57 (0.076)	17 (0.254)	227 (0.302)	3 (0.045)	112 (0.149)	5 (0.075)	6 (0.008)	1 (0.015)	31 (0.041)	5 (0.075)	18 (0.024)	0 (0)	44 (0.059)	0	0	14 (0.209)	2 (0.003)	1 (0.015)	6 (0.008)	17 (0.254)	0	1 (0.015)
B	71 (0.122)	-	11 (0.019)	-	4 (0.007)	0	43 (0.074)	1 (0.025)	9 (0.015)	1 (0.025)	62 (0.106)	0	160 (0.274)	18 (0.45)	9 (0.015)	0	29 (0.05)	0	26 (0.045)	1 (0.025)	133 (0.228)	0	7 (0.012)	2 (0.05)	0 (0)	3 (0.075)	20 (0.034)	14 (0.35)	0	0
H1	30 (0.141)	-	0	-	2 (0.009)	0	8 (0.038)	0	0	0	37 (0.174)	0	73 (0.343)	14 (0.933)	0	0	4 (0.019)	0	3 (0.014)	1 (0.067)	55 (0.258)	0	1 (0.005)	0	0	0	0	0	0	0
H2	17 (0.137)	-	0	-	0	0	1 (0.008)	0	1 (0.008)	5 (0.625)	46 (0.371)	1 (0.125)	47 (0.379)	1 (0.125)	3 (0.024)	0	2 (0.016)	1 (0.125)	2 (0.016)	0	5 (0.04)	0	0	0	0	0	0	0	0	0
H3	89 (0.52)	-	0	-	0	0	4 (0.023)	0	21 (0.123)	4 (0.2)	35 (0.205)	1 (0.05)	9 (0.053)	4 (0.2)	0	0	0	0	4 (0.023)	0	3 (0.018)	0	0	0	0	0	6 (0.035)	11 (0.55)	0	0
